# Supplementary material
Source: PubMed Central journal article supplement (PMC3493150)
Supplement: NIHMS417286-supplement-supplement_1.pdf [file NIHMS417286-supplement-supplement_1.pdf]

**Supplementary Table 1.** Histologic Findings in 30 Patients With CS

| Patient no. | Collagen deposition in the duodenum |              | Additional duodenal findings                |                           |                       |                      |                         |
|-------------|-------------------------------------|--------------|---------------------------------------------|---------------------------|-----------------------|----------------------|-------------------------|
|             | Thickness average (minimum–maximum) | Distribution | IELs per 100 epithelial cells/clone present | Degree of villous atrophy | Epithelial denudation | Chronic inflammation | Acute inflammation      |
| 1           | 30 (20–40)                          | Diffuse      | 20/unknown                                  | Total                     | Yes                   | Moderate             | Mild with focal erosion |
| 2           | 29                                  | Diffuse      | 40/no                                       | Subtotal                  | No                    | Marked               | No                      |
| 3           | 20 (18–22)                          | Patchy       | 60/no                                       | Subtotal                  | No                    | Marked               | Mild                    |
| 4           | 30.5 (18–43)                        | Diffuse      | 20/unknown                                  | Total                     | Yes                   | Marked               | Mild                    |
| 5           | 44 (18–70)                          | Diffuse      | 20/no                                       | Total                     | Yes                   | Moderate             | Moderate                |
| 6           | 21 (18–24)                          | Diffuse      | 40/no                                       | Total                     | Yes                   | Marked               | No                      |
| 7           | 42 (24–60)                          | Patchy       | 50/no                                       | Total                     | Yes                   | Moderate             | No                      |
| 8           | 52.5 (18–87)                        | Diffuse      | 20/no                                       | Total                     | Yes                   | Moderate             | Mild                    |
| 9           | 30.5 (25–36)                        | Diffuse      | 20/no                                       | Total                     | Yes                   | Moderate             | No                      |
| 10          | 22                                  | Diffuse      | 50/no                                       | Total                     | No                    | Moderate             | No                      |
| 11          | 32                                  | Diffuse      | 20/no                                       | Subtotal                  | No                    | Mild                 | No                      |
| 12          | 28 (18–38)                          | Diffuse      | 40/no                                       | Total                     | Yes                   | Marked               | Mild                    |
| 13          | 56.5 (18–95)                        | Diffuse      | 20/no                                       | Total                     | Yes                   | Moderate             | Mild with erosion       |
| 14          | 26.5 (18–35)                        | Diffuse      | 40/unknown                                  | Total                     | Yes                   | Moderate             | No                      |
| 15          | 20.5 (18–23)                        | Diffuse      | 40/unknown                                  | Total                     | Yes                   | Marked               | No                      |
| 16          | 28.5 (20–37)                        | Diffuse      | 70/unknown                                  | Total                     | Yes                   | Marked               | Moderate                |
| 17          | 29                                  | Patchy       | 70/unknown                                  | Subtotal                  | No                    | Marked               | No                      |
| 18          | 20                                  | Patchy       | 100/unknown                                 | Total                     | No                    | Marked               | No                      |
| 19          | 25 (18–32)                          | Diffuse      | 40/unknown                                  | Total                     | Yes                   | Marked               | No                      |
| 20          | 24 (18–30)                          | Patchy       | 40/unknown                                  | Subtotal                  | No                    | Moderate             | No                      |
| 21          | 24 (18–30)                          | Diffuse      | 50/unknown                                  | Total                     | Yes                   | Marked               | Mild                    |
| 22          | 34 (18–50)                          | Diffuse      | 60/unknown                                  | Total                     | Yes                   | Marked               | Moderate                |
| 23          | 24 (18–30)                          | Diffuse      | 40/unknown                                  | Total                     | Yes                   | Moderate             | Mild                    |
| 24          | 44.5 (26–63)                        | Diffuse      | 20/unknown                                  | Total                     | Yes                   | Moderate             | No                      |
| 25          | 29                                  | Diffuse      | 90/no                                       | Total                     | No                    | Marked               | No                      |
| 26          | 32                                  | Diffuse      | 40/no                                       | Subtotal                  | No                    | Marked               | No                      |
| 27          | 31 (20–42)                          | Diffuse      | 60/no                                       | Subtotal                  | Yes                   | Moderate             | No                      |
| 28          | 23 (18–28)                          | Patchy       | 40/no                                       | Subtotal                  | Yes                   | Moderate             | No                      |
| 29          | 29                                  | Diffuse      | 40/no                                       | Subtotal                  | No                    | Moderate             | No                      |
| 30          | 20                                  | Patchy       | 20/no                                       | Subtotal                  | Yes                   | Moderate             | Mild                    |

**Supplementary Table 2.** Summary of Clinical Characteristics of 30 Patients With CS

| Patient no. | Age/gender | Gluten sensitivity antibodies | Prior diagnosis of CD | Associated disorders                                                           | HLA-DQ genotype | Treatment                                                                                                    | Outcome/histologic follow-up                                                                                                   | Follow-up (mo) |
|-------------|------------|-------------------------------|-----------------------|--------------------------------------------------------------------------------|-----------------|--------------------------------------------------------------------------------------------------------------|--------------------------------------------------------------------------------------------------------------------------------|----------------|
| 1           | 57/F       | (-)                           | No                    | Collagenous colitis                                                            | No DQ2/DQ8      | GFD, then normal diet. Budesonide 9 mg/day                                                                   | Clinical response. No follow-up biopsy                                                                                         | 1              |
| 2           | 79/F       | (-)                           | Yes                   | No                                                                             | DQ2             | GFD. Prednisone 30 mg/day, then budesonide 9 mg/day                                                          | Clinical response. No follow-up biopsy                                                                                         | 9              |
| 3           | 82/F       | (-)                           | Yes                   | Collagenous colitis, lymphocytic gastritis, pneumatosis intestinalis           | N/A             | GFD. Budesonide 9 mg/day. Total parenteral nutrition                                                         | Clinical response. Reversal of fibrosis but persistent total villous atrophy. Died of ischemic stroke and aspiration pneumonia | 65             |
| 4           | 74/M       | (-)                           | No                    | Lymphocytic colitis, chronic interstitial pneumonia, unexplained cirrhosis     | DQ2             | GFD. Prednisone 70 mg/day, then budesonide 9 mg/day. Total parenteral nutrition                              | Clinical response. Remission                                                                                                   | 9              |
| 5           | 85/F       | (-)                           | No                    | Lymphocytic colitis, collagenous gastritis, small-bowel bacterial overgrowth   | DQ2             | GFD. Budesonide 9 mg/day. Total parenteral nutrition                                                         | Clinical response. Remission                                                                                                   | 16             |
| 6           | 68/M       | (-)                           | No                    | Collagenous gastritis, lymphocytic gastritis, small-bowel bacterial overgrowth | DQ2 homozygous  | GFD. Budesonide 9 mg/day                                                                                     | Clinical response. Persistent villous atrophy and collagen deposition on follow-up biopsy                                      | 12             |
| 7           | 56/F       | (-)                           | Yes                   | Hypothyroidism, unexplained cirrhosis                                          | DQ2             | GFD. Prednisone 40 mg/day plus azathioprine 150 mg/day, then budesonide 9 mg/day. Total parenteral nutrition | Clinical response. Persistent villous atrophy and collagen deposition on follow-up biopsy                                      | 21             |
| 8           | 55/F       | (-)                           | No                    | Lymphocytic colitis, small-bowel bacterial overgrowth                          | DQ2             | GFD. Budesonide 9 mg/day                                                                                     | Clinical response. Persistent villous atrophy and collagen deposition on follow-up biopsy                                      | 12             |
| 9           | 78/F       | (+)                           | Yes                   | No                                                                             | DQ2             | GFD. Total parenteral nutrition                                                                              | No response. Persistent villous atrophy and collagen deposition on follow-up biopsy                                            | 24             |
| 10          | 66/F       | (-)                           | Yes                   | Collagenous colitis, small-bowel bacterial overgrowth                          | DQ2 and DQ8     | GFD. Budesonide 9 mg/day                                                                                     | Clinical response. Reversal of fibrosis but persistent total villous atrophy                                                   | 84             |
| 11          | 81/F       | (-)                           | No                    | Collagenous colitis, combined variable immunodeficiency                        | No DQ2/DQ8      | GFD, then normal diet. Prednisone 20 mg, then budesonide 9 mg/day                                            | Clinical response. Persistent villous atrophy and collagen deposition on follow-up biopsy                                      | 14             |
| 12          | 59/F       | (-)                           | Yes                   | No                                                                             | DQ2             | GFD. Dexamethasone 8 mg/day. Total parenteral nutrition                                                      | No response. Reversal of fibrosis but persistent total villous atrophy. Died of malnutrition and sepsis                        | 6              |
| 13          | 67/F       | (-)                           | Yes                   | Autoimmune hepatitis, hyposplenism, Raynaud's phenomena                        | DQ2             | GFD. Prednisone 40 mg/day, then budesonide 9 mg/day                                                          | Clinical response. Reversal of fibrosis but persistent partial villous atrophy                                                 | 24             |
| 14          | 64/F       | (-)                           | No                    | Discoid lupus, antiphospholipid syndrome, small-bowel bacterial overgrowth     | N/A             | GFD. Prednisone 40 mg/day. Total parenteral nutrition                                                        | Clinical response. No follow-up biopsy                                                                                         | 12             |
| 15          | 59/F       | (+)                           | Yes                   | No                                                                             | N/A             | GFD. IV iron supplementation                                                                                 | Clinical response. No follow-up biopsy                                                                                         | 10             |
| 16          | 77/F       | (-)                           | No                    | Osteoporosis                                                                   | N/A             | GFD. Budesonide 9 mg/day                                                                                     | Clinical response. No follow-up biopsy                                                                                         | 8              |
| 17          | 91/M       | (-)                           | No                    | Chronic pancreatitis                                                           | DQ2 homozygous  | GFD. Budesonide 9 mg/day. Pancreatic enzymes                                                                 | Inadequate follow-up. No follow-up biopsy                                                                                      | 1              |
| 18          | 75/M       | (+)                           | Yes                   | Hypothyroidism, side-branch intraductal mucinous pancreatic tumor              | N/A             | GFD. Total parenteral nutrition                                                                              | No response. No follow-up biopsy                                                                                               | 26             |

Supplementary Table 2. Continued

| Patient no. | Age/gender | Gluten sensitivity antibodies | Prior diagnosis of CD | Associated disorders                                                    | HLA-DQ genotype | Treatment                                                             | Outcome/histologic follow-up                                                              | Follow-up (mo) |
|-------------|------------|-------------------------------|-----------------------|-------------------------------------------------------------------------|-----------------|-----------------------------------------------------------------------|-------------------------------------------------------------------------------------------|----------------|
| 19          | 79/F       | (-)                           | No                    | No                                                                      | No DQ2/DQ8      | GFD. Budesonide 9 mg/day                                              | Clinical response. Remission                                                              | 24             |
| 20          | 67/F       | (-)                           | No                    | Lymphocytic myocarditis, recurrent iritis                               | DQ2 and DQ8     | GFD. Prednisone 40 mg/day, then 20 mg/day and budesonide 9 mg/day     | Clinical response. No follow-up biopsy                                                    | 6              |
| 21          | 80/M       | (-)                           | No                    | Small-bowel bacterial overgrowth, adult-onset autoimmune enteropathy    | No DQ2/DQ8      | GFD, then normal diet. Prednisone 40 mg/day, then budesonide 9 mg/day | Clinical response. No follow-up biopsy                                                    | 1              |
| 22          | 62/F       | (-)                           | No                    | Collagenous colitis                                                     | N/A             | GFD. Octreotide. Total parenteral nutrition                           | No response. No follow-up biopsy                                                          | 1              |
| 23          | 72/M       | (-)                           | No                    | No                                                                      | N/A             | GFD. Prednisone 60 mg/day, then 20 mg/day                             | Clinical response. No follow-up biopsy                                                    | 19             |
| 24          | 79/F       | (-)                           | No                    | Small-bowel bacterial overgrowth, adult-onset autoimmune enteropathy    | DQ2             | GFD. Budesonide 9 mg/day                                              | Clinical response. Remission                                                              | 20             |
| 25          | 85/M       | (-)                           | No                    | Benign pancreatic duct stricture                                        | DQ2             | GFD. Prednisone 40 mg/day. Total parenteral nutrition                 | Clinical response. No follow-up biopsy                                                    | 14             |
| 26          | 58/F       | (-)                           | Yes                   | Small-bowel bacterial overgrowth                                        | DQ2             | GFD. Prednisone 40 mg/day, then budesonide 9 mg/day                   | Clinical response. Remission                                                              | 24             |
| 27          | 76/M       | (-)                           | No                    | No                                                                      | No DQ2/DQ8      | GFD. Budesonide 9 mg/day                                              | Clinical response. No follow-up biopsy                                                    | 5              |
| 28          | 75/F       | (-)                           | No                    | Collagenous colitis, adult-onset autoimmune enteropathy, hypothyroidism | DQ2             | GFD. Prednisone 40 mg/day, then budesonide 9 mg/day                   | Clinical response. Persistent villous atrophy and collagen deposition on follow-up biopsy | 24             |
| 29          | 62/F       | (-)                           | Yes                   | Lymphocytic colitis                                                     | DQ2             | GFD. Prednisone 40 mg/day, azathioprine 50 mg/day                     | Clinical response. No follow-up biopsy                                                    | 24             |
| 30          | 75/F       | (-)                           | No                    | Unexplained chronic renal failure, hypothyroidism                       | N/A             | GFD. Budesonide 9 mg/day                                              | Inadequate follow-up. No follow-up biopsy                                                 | 1              |
